# Supplementary material for: Avoidant/Restrictive Food Disorder (ARFID), Food Neophobia, Other Eating-Related Behaviours and Feeding Practices among Children with Autism Spectrum Disorder and in Non-Clinical Sample: A Preliminary Study
Source: MDPI journal article supplement (doi:10.3390/ijerph20105822), 2023-05-14
Supplement: s1 [file s1]

Table S1: Our results of correlation analysis.

Clinical sample

N = 54

|                                           | Sensory sensitivity (ASRS) | Food fussiness (CEBQ) | Enjoyment of food (CEBQ) | Concern about child weight (CFQ) | Pressure to eat (CFQ) | Monitoring (CFQ) | Selective eating (EDY-Q) |
|-------------------------------------------|----------------------------|-----------------------|--------------------------|----------------------------------|-----------------------|------------------|--------------------------|
| Zmienna                                   |                            |                       |                          |                                  |                       |                  |                          |
| Dependent variable: Food neophobia (CFNS) | -0,30                      | 0,84                  | -0,39                    | 0,18                             | 0,53                  | 0,37             | 0,70                     |

Non-clinical sample

N = 51

|                       | Sensory sensitivity (ASRS) | Food fussiness (CEBQ) | Enjoyment of food (CEBQ) | Concern about child weight (CFQ) | Pressure to eat (CFQ) | Monitoring (CFQ) | Selective eating (EDY-Q) |
|-----------------------|----------------------------|-----------------------|--------------------------|----------------------------------|-----------------------|------------------|--------------------------|
| Zmienna               |                            |                       |                          |                                  |                       |                  |                          |
| Food neophobia (CFNS) | 0,17                       | -0,25                 | -0,14                    | -0,04                            | -0,12                 | -0,25            | -0,27                    |
